# Supplementary material for: Prediction of absolute unsaturated hydraulic conductivity – comparison of four different capillary bundle models
Source: Copernicus journal article supplement (doi:10.5194/hess-27-4579-2023), 2023-12-20
Supplement: Supplementary file 1 [file hess-27-4579-2023-supplement.pdf]

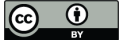

*Supplement of*

## **Prediction of absolute unsaturated hydraulic conductivity – comparison of four different capillary bundle models**

**Andre Peters et al.**

*Correspondence to:* Andre Peters (a.peters@tu-braunschweig.de)

The copyright of individual parts of the supplement might differ from the article licence.

10 S 1.1: All calibration curves (pages 2 to 13)

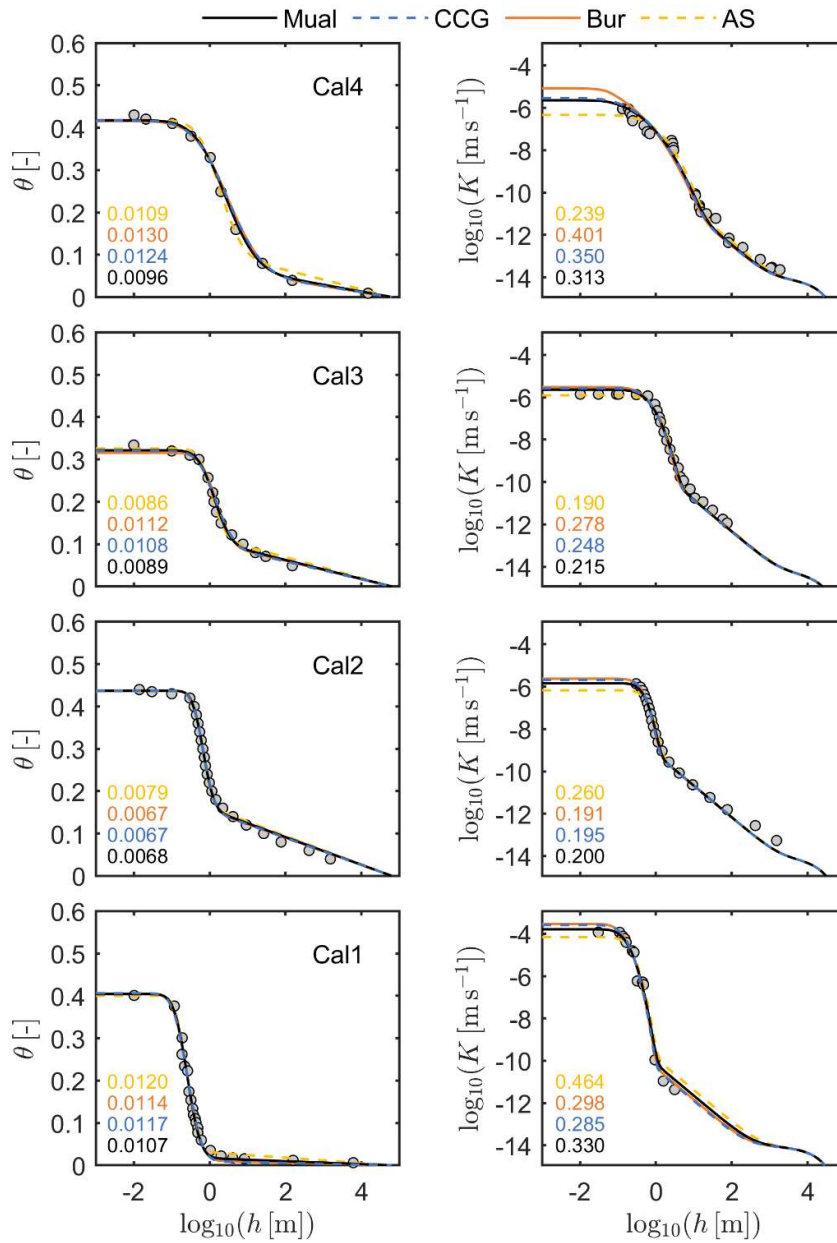

11

12 Fig. S1: Calibration data sets and the fitted water retention and conductivity functions used to  
 13 calibrate the saturated tortuosity coefficient  $\tau_s$ . Shown are data set 1 to 4 of the 12 calibration data  
 14 sets and the **Kos-PDI** retention model combined with the 4 capillary bundle models. Parameter  $\tau_s$   
 15 and the retention parameters were allowed to vary. Numbers in the subplots indicate  $RMSE_{\theta}$  and  
 16  $RMSE_{\log K}$  values for the various model combinations.

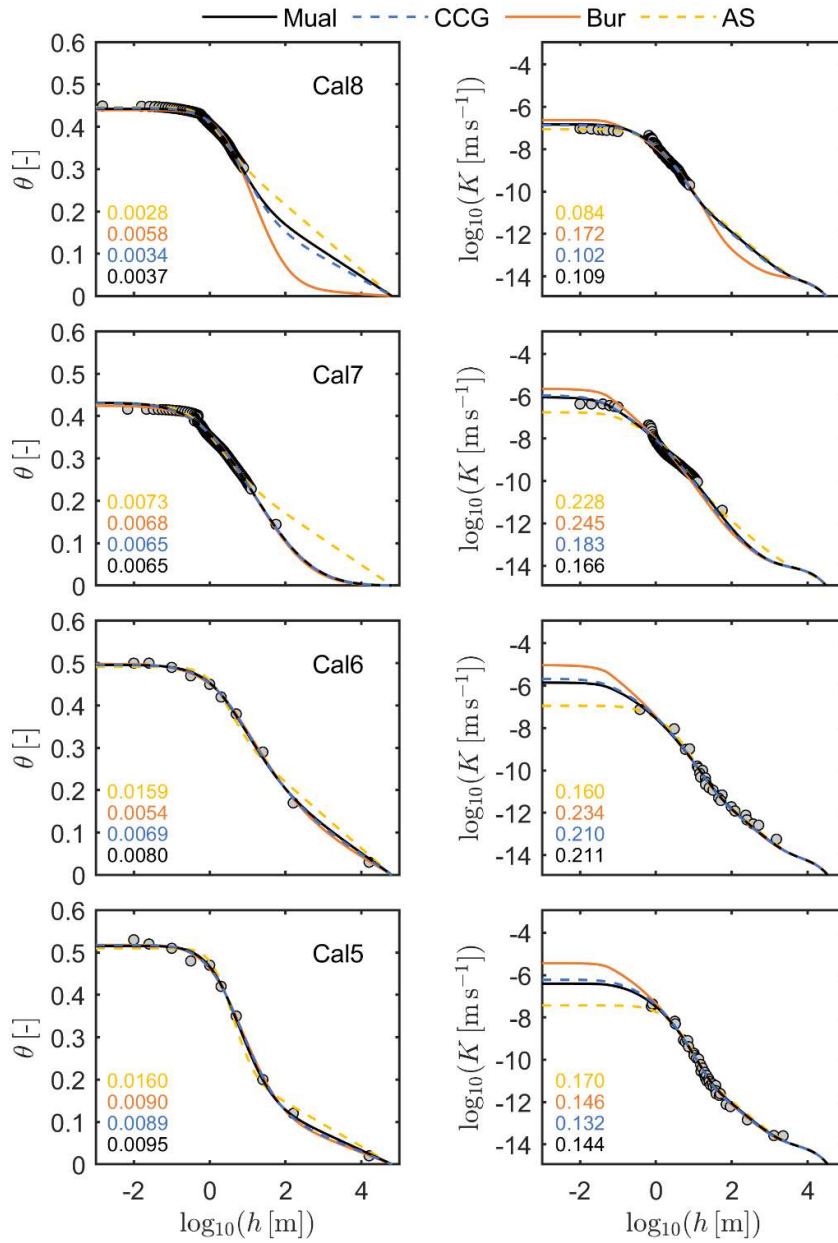

17

18 Fig. S2: Calibration data sets and the fitted water retention and conductivity functions used to  
 19 calibrate the saturated tortuosity coefficient  $\tau_s$ . Shown are data set 5 to 8 of the 12 calibration data  
 20 sets and the **Kos-PDI** retention model combined with the 4 capillary bundle models. Parameter  $\tau_s$   
 21 and the retention parameters were allowed to vary. Numbers in the subplots indicate RMSE $_{\theta}$  and  
 22 RMSE $_{\log K}$  values for the various model combinations.

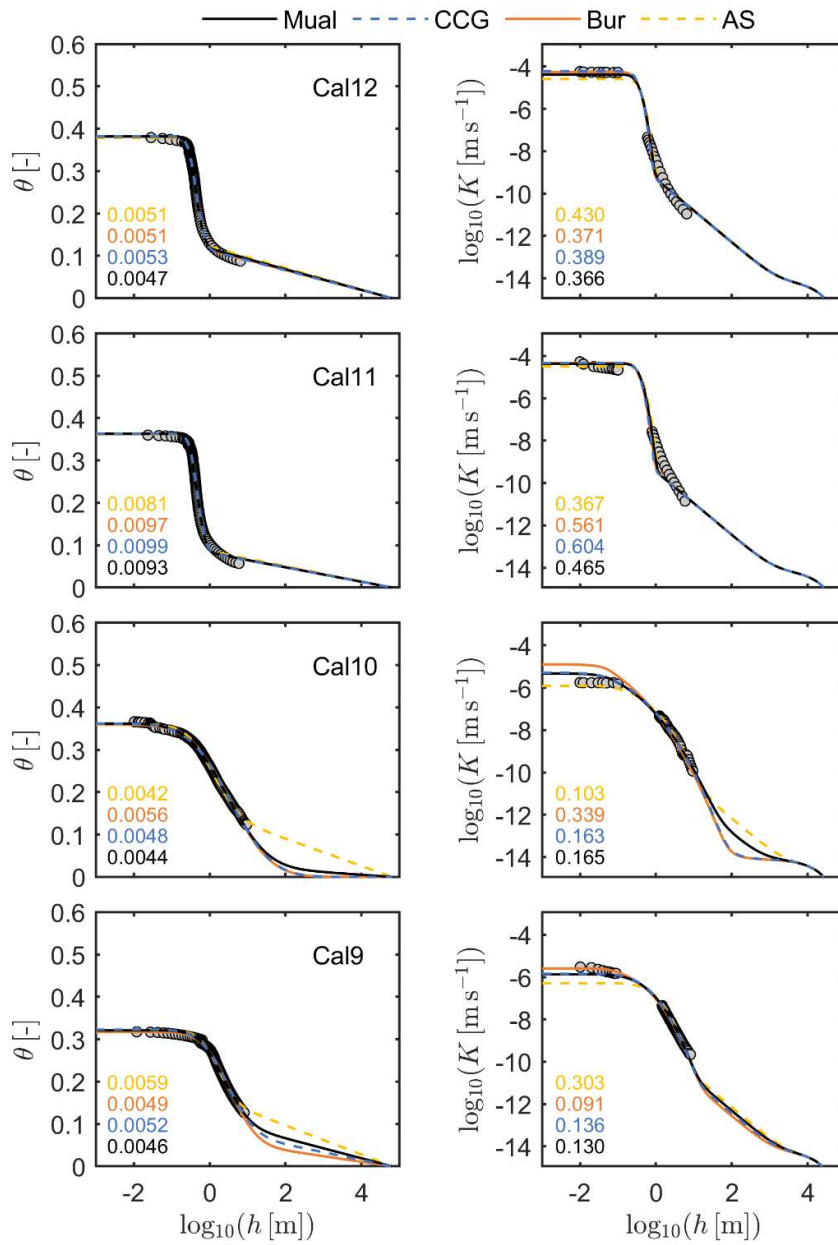

23

24 Fig. S3: Calibration data sets and the fitted water retention and conductivity functions used to  
 25 calibrate the saturated tortuosity coefficient  $\tau_s$ . Shown are data set 9 to 12 of the 12 calibration data  
 26 sets and the **Kos-PDI** retention model combined with the 4 capillary bundle models. Parameter  $\tau_s$   
 27 and the retention parameters were allowed to vary. Numbers in the subplots indicate RMSE<sub>θ</sub> and  
 28 RMSE<sub>logK</sub> values for the various model combinations.

29

30

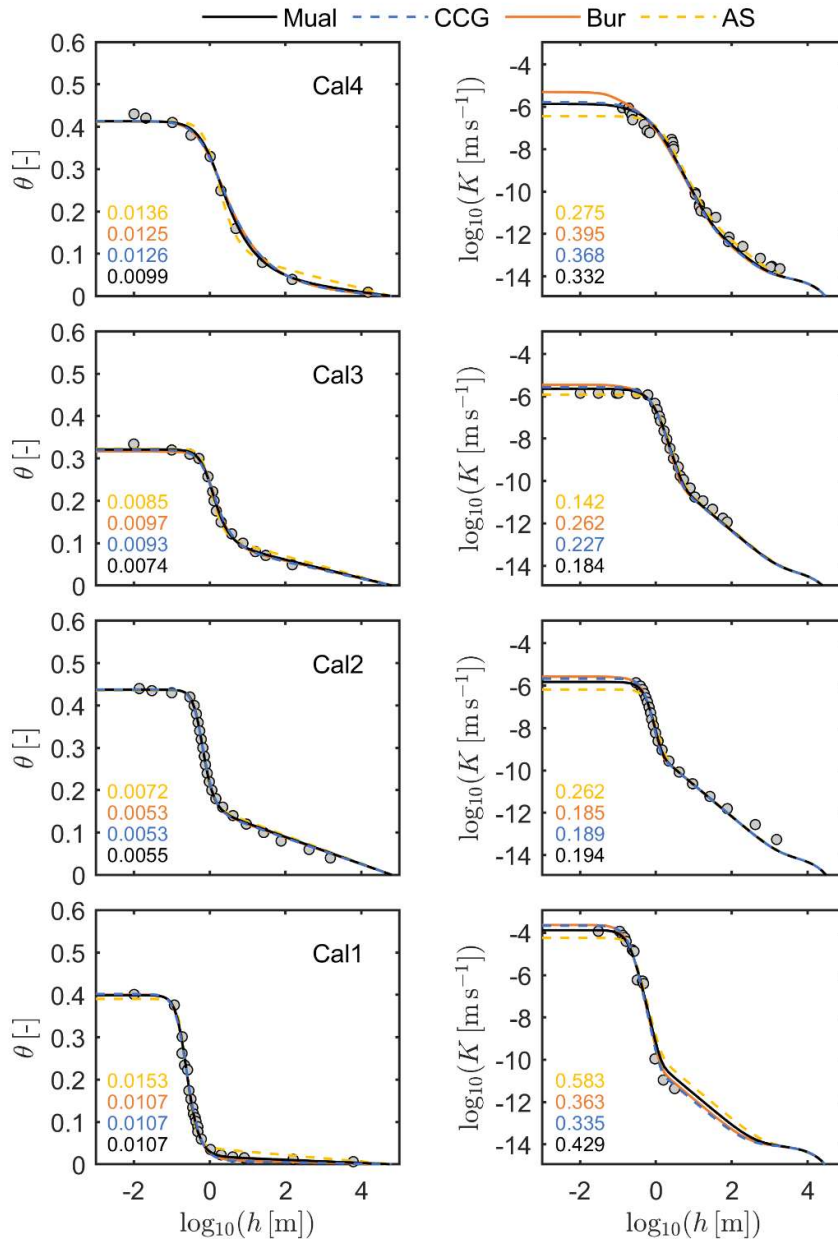

31

32 Fig. S4: Calibration data sets and the fitted water retention and conductivity functions used to  
 33 calibrate the saturated tortuosity coefficient  $\tau_s$ . Shown are data set 1 to 4 of the 12 calibration data  
 34 sets and the **vGc-PDI** retention model combined with the 4 capillary bundle models. Parameter  $\tau_s$   
 35 and the retention parameters were allowed to vary. Numbers in the subplots indicate RMSE<sub>θ</sub> and  
 36 RMSE<sub>logK</sub> values for the various model combinations.

37

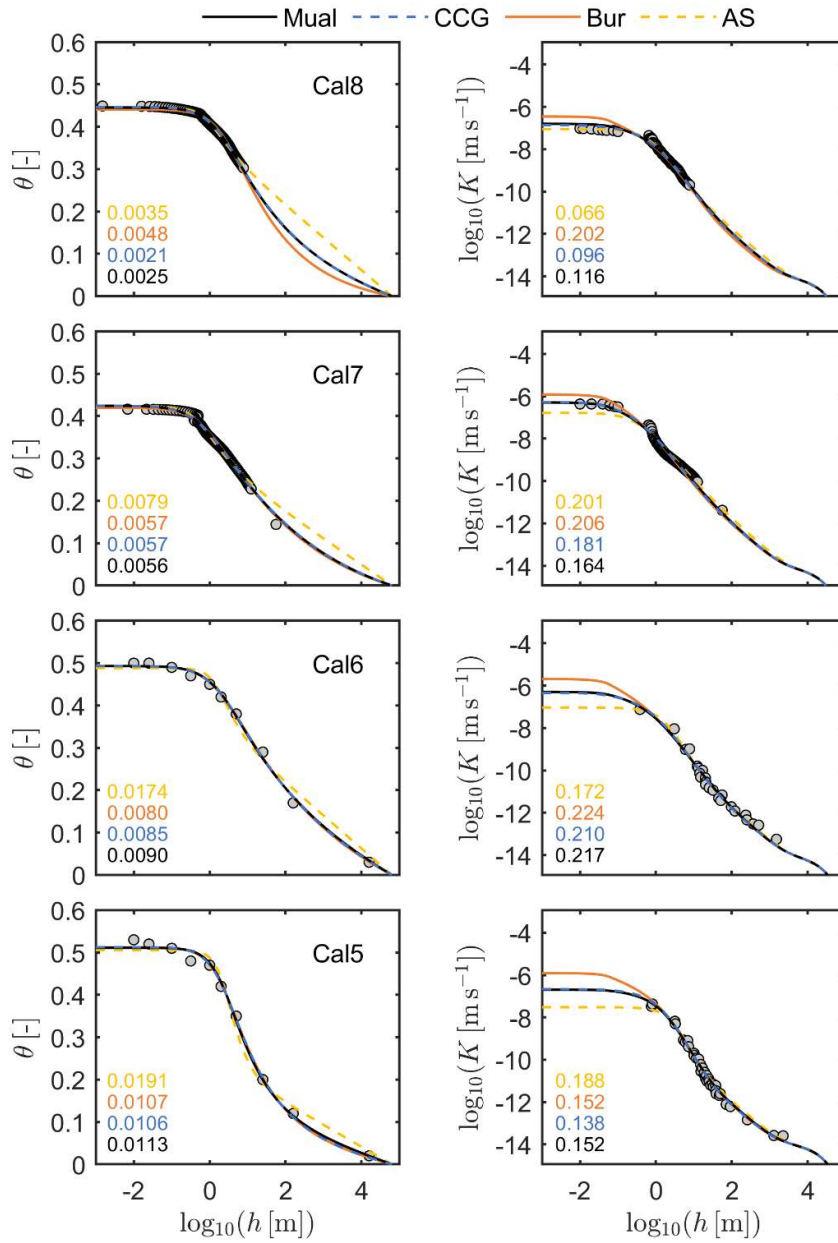

38

39 Fig. S5: Calibration data sets and the fitted water retention and conductivity functions used to  
 40 calibrate the saturated tortuosity coefficient  $\tau_s$ . Shown are data set 5 to 8 of the 12 calibration data  
 41 sets and the **vGc-PDI** retention model combined with the 4 capillary bundle models. Parameter  $\tau_s$   
 42 and the retention parameters were allowed to vary. Numbers in the subplots indicate RMSE<sub>θ</sub> and  
 43 RMSE<sub>logK</sub> values for the various model combinations.

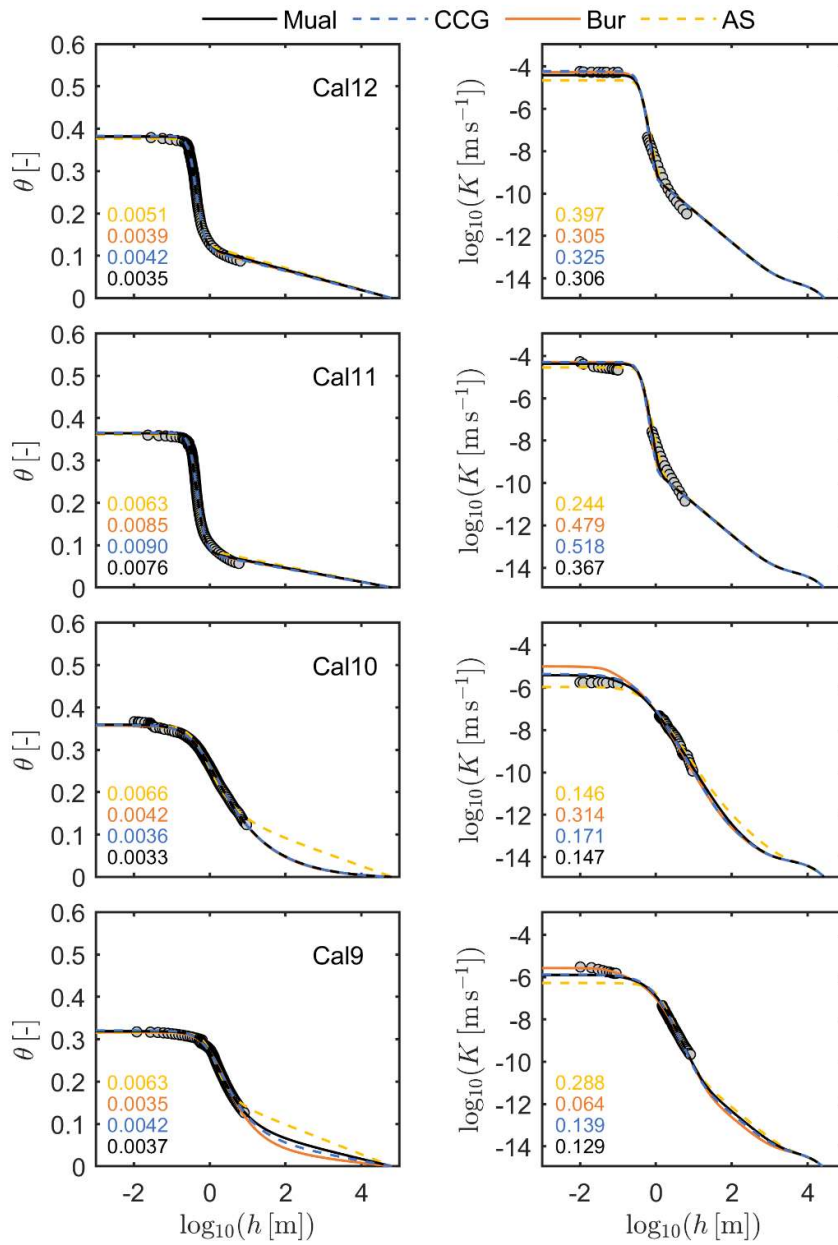

44

45 Fig. S6 Calibration data sets and the fitted water retention and conductivity functions used to  
 46 calibrate the saturated tortuosity coefficient  $\tau_s$ . Shown are data set 9 to 12 of the 12 calibration data  
 47 sets and the **vGc-PDI** retention model combined with the 4 capillary bundle models. Parameter  $\tau_s$   
 48 and the retention parameters were allowed to vary. Numbers in the subplots indicate RMSE<sub>θ</sub> and  
 49 RMSE<sub>logK</sub> values for the various model combinations.

50

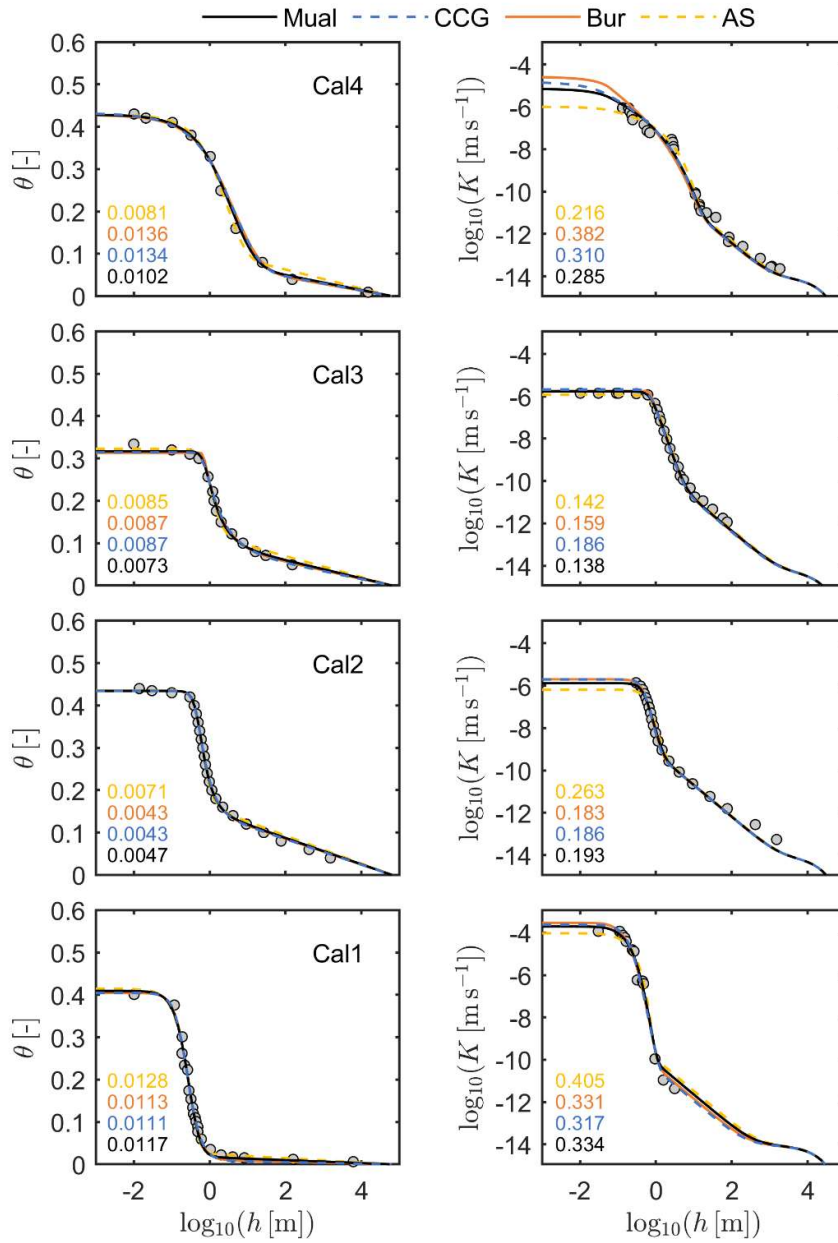

51

52 Fig. S7: Calibration data sets and the fitted water retention and conductivity functions used to  
 53 calibrate the saturated tortuosity coefficient  $\tau_s$ . Shown are data set 1 to 4 of the 12 calibration data  
 54 sets and the **vGmn-PDI** retention model combined with the 4 capillary bundle models. Parameter  $\tau_s$   
 55 and the retention parameters were allowed to vary. Numbers in the subplots indicate RMSE<sub>θ</sub> and  
 56 RMSE<sub>logK</sub> values for the various model combinations.

57



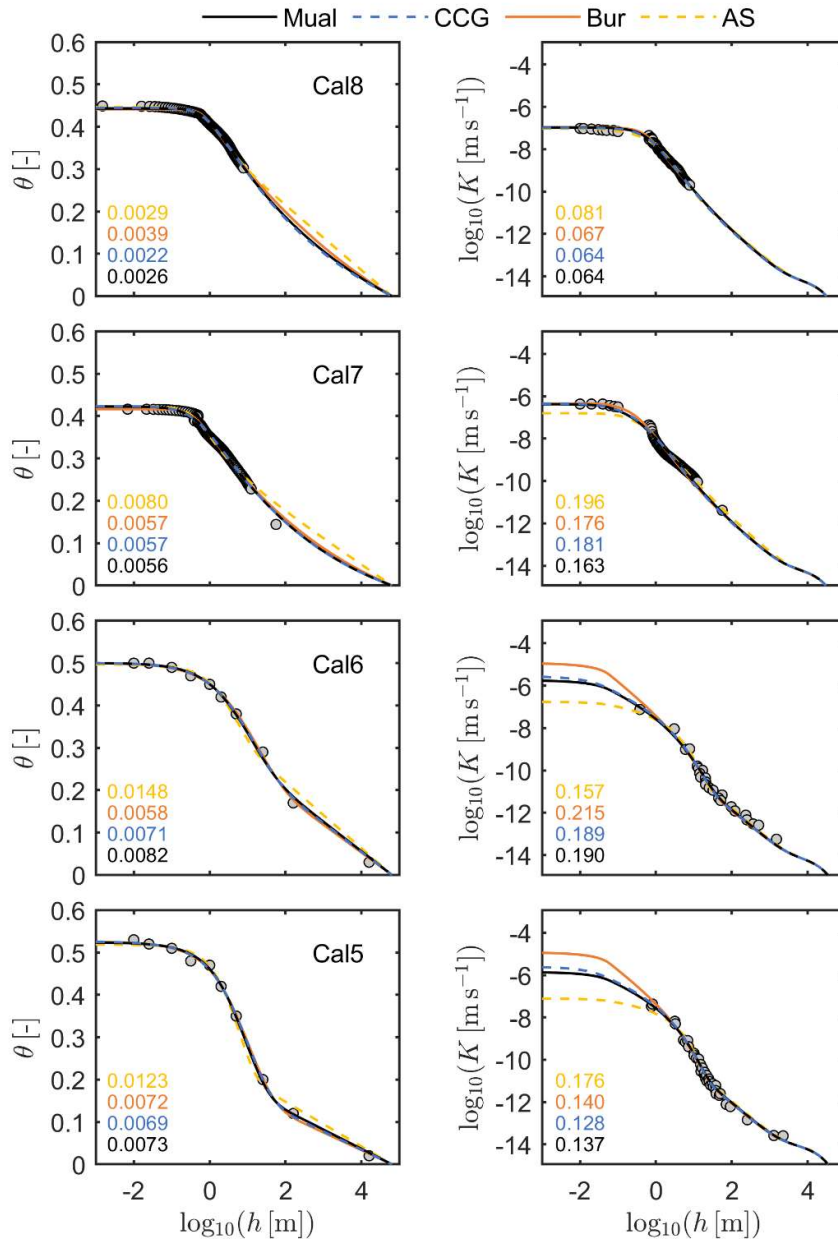

58

59 Fig. S8: Calibration data sets and the fitted water retention and conductivity functions used to  
 60 calibrate the saturated tortuosity coefficient  $\tau_s$ . Shown are data set 5 to 8 of the 12 calibration data  
 61 sets and the **vGmn-PDI** retention model combined with the 4 capillary bundle models. Parameter  $\tau_s$   
 62 and the retention parameters were allowed to vary. Numbers in the subplots indicate RMSE <sub>$\theta$</sub>  and  
 63 RMSE <sub>$\log_{10}K$</sub>  values for the various model combinations.

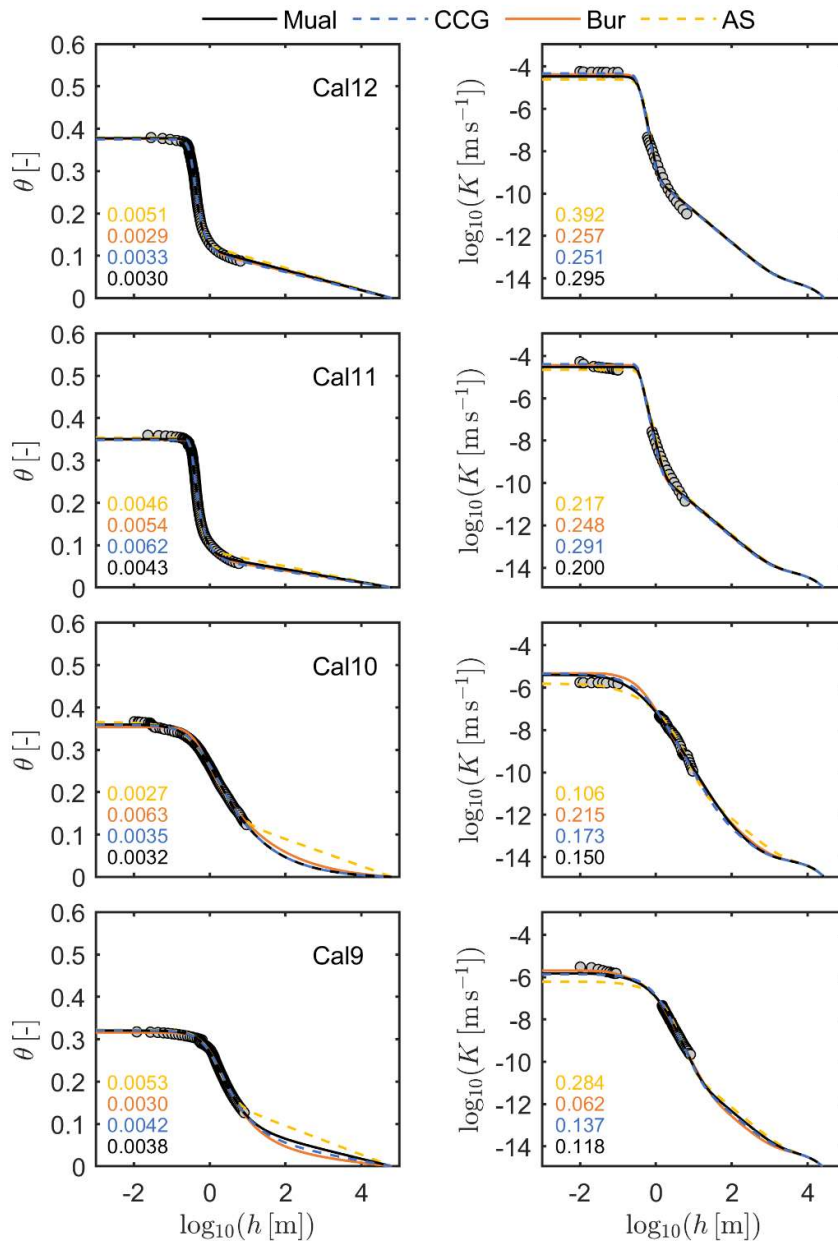

64

65 Fig. S9: Calibration data sets and the fitted water retention and conductivity functions used to  
 66 calibrate the saturated tortuosity coefficient  $\tau_s$ . Shown are data set 9 to 12 of the 12 calibration data  
 67 sets and the **vGmn-PDI** retention model combined with the 4 capillary bundle models. Parameter  $\tau_s$   
 68 and the retention parameters were allowed to vary. Numbers in the subplots indicate RMSE<sub>θ</sub> and  
 69 RMSE<sub>logK</sub> values for the various model combinations.

70

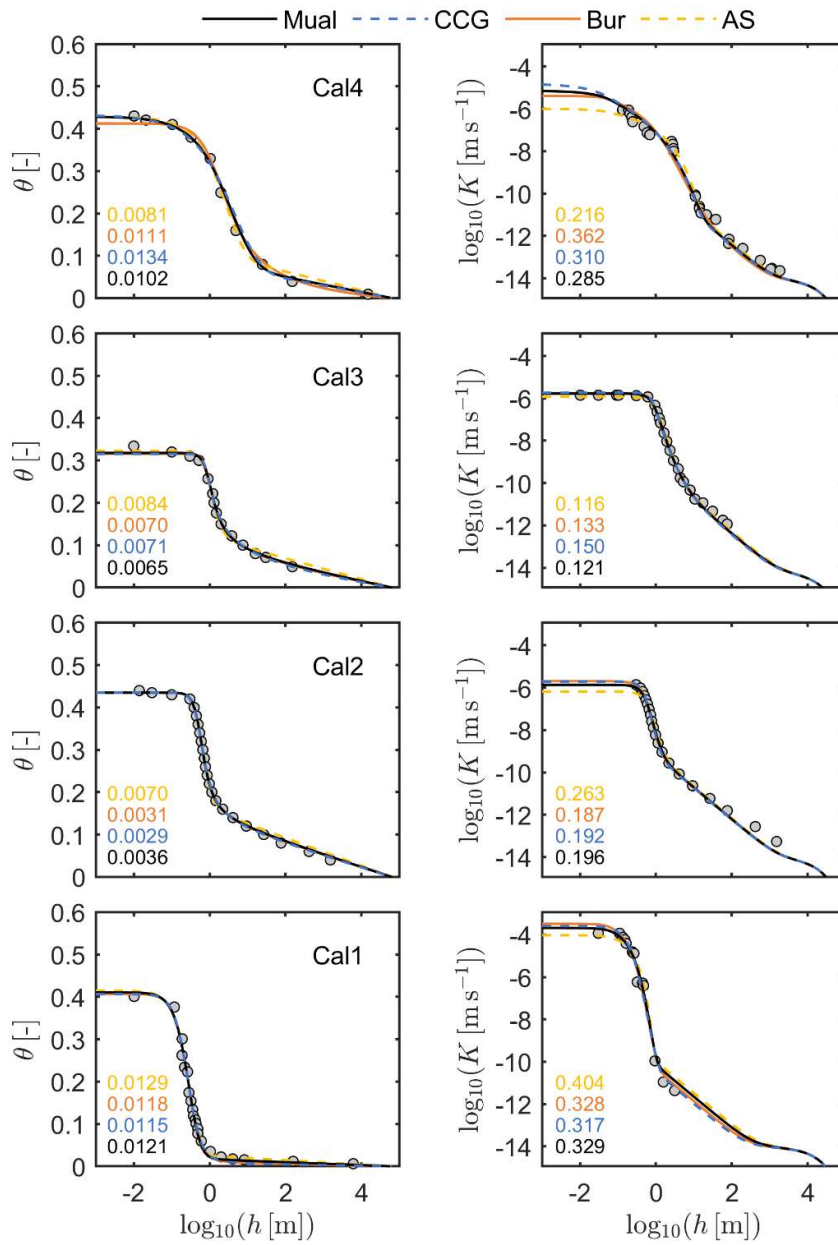

71

72 Fig. S10: Calibration data sets and the fitted water retention and conductivity functions used to  
 73 calibrate the saturated tortuosity coefficient  $\tau_s$ . Shown are data set 1 to 4 of the 12 calibration data  
 74 sets and the **FX-PDI** retention model combined with the 4 capillary bundle models. Parameter  $\tau_s$  and  
 75 the retention parameters were allowed to vary. Numbers in the subplots indicate  $RMSE_\theta$  and  
 76  $RMSE_{\log K}$  values for the various model combinations.

77

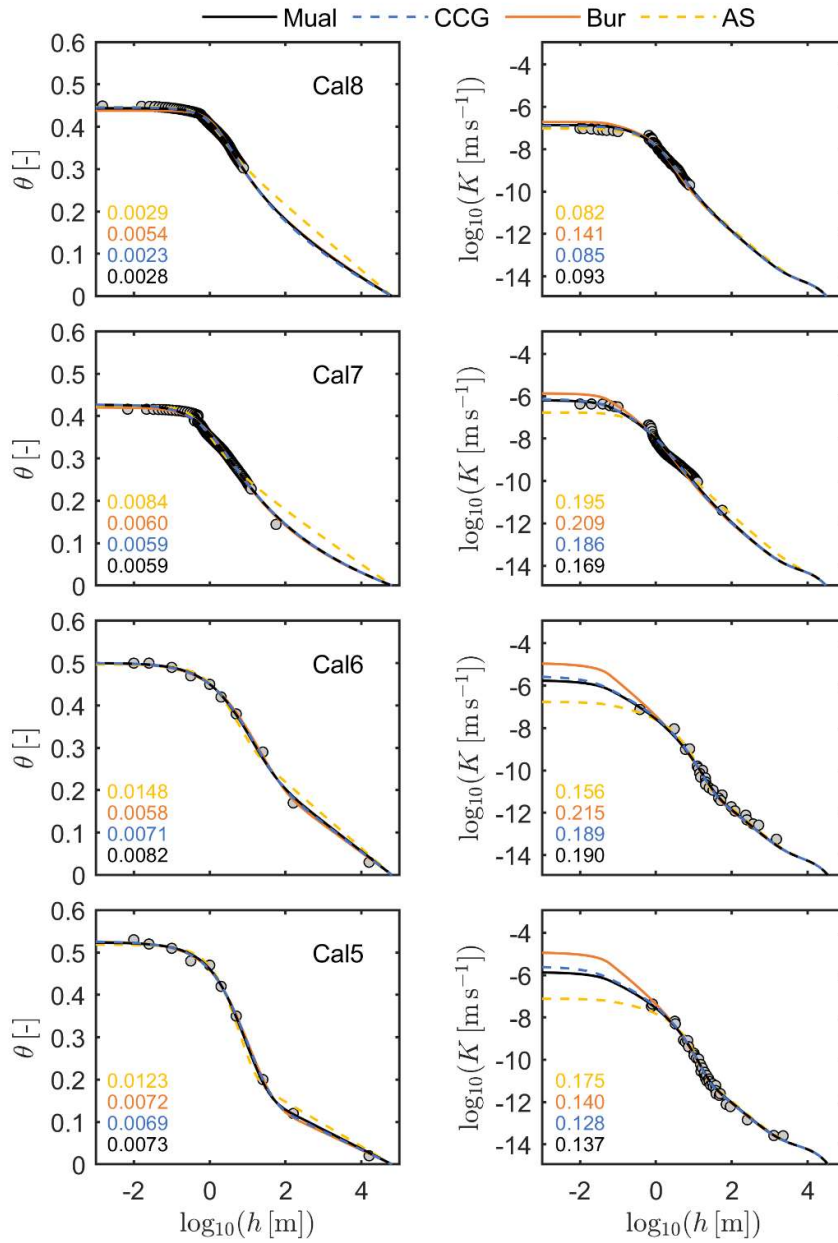

78

79 Fig. S11: Calibration data sets and the fitted water retention and conductivity functions used to  
 80 calibrate the saturated tortuosity coefficient  $\tau_s$ . Shown are data set 5 to 8 of the 12 calibration data  
 81 sets and the **FX-PDI** retention model combined with the 4 capillary bundle models. Parameter  $\tau_s$  and  
 82 the retention parameters were allowed to vary. Numbers in the subplots indicate RMSE<sub>θ</sub> and  
 83 RMSE<sub>logK</sub> values for the various model combinations.

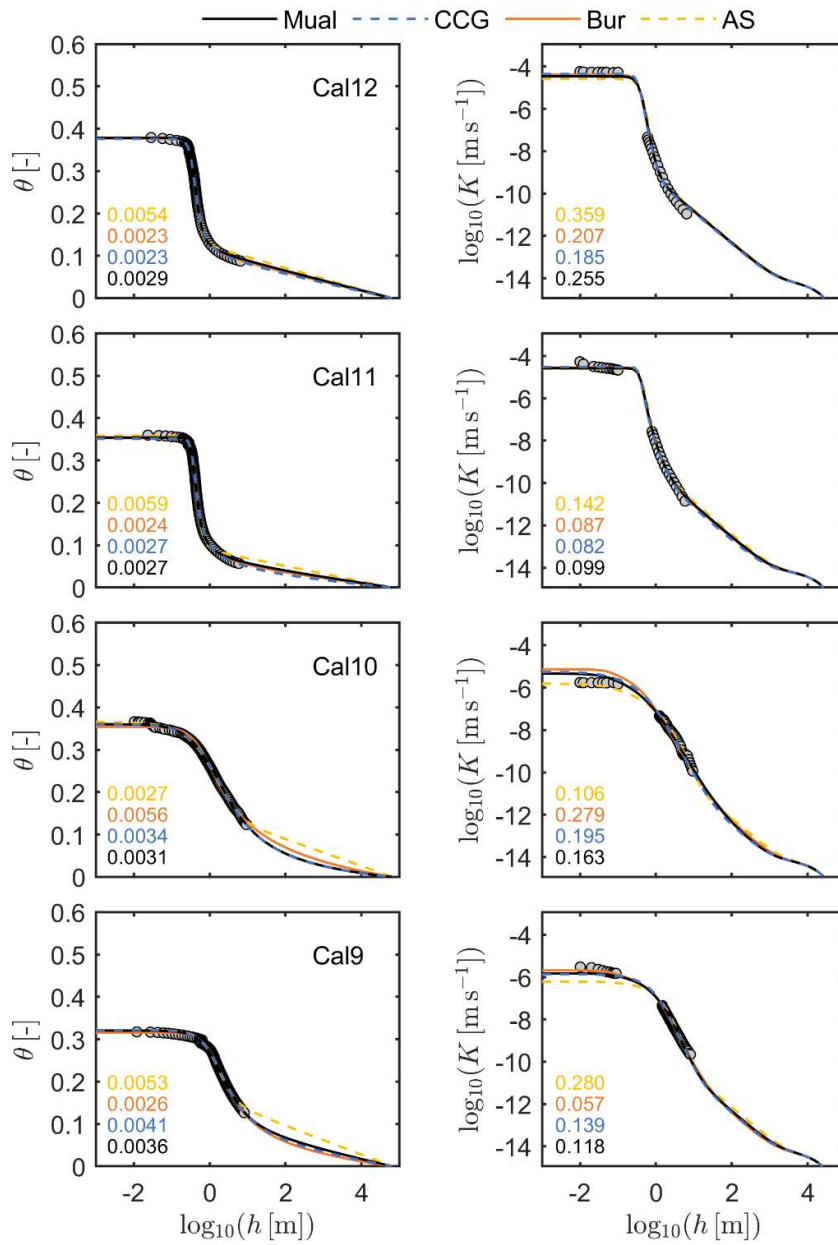

84

85 Fig. S12: Calibration data sets and the fitted water retention and conductivity functions used to  
 86 calibrate the saturated tortuosity coefficient  $\tau_s$ . Shown are data set 9 to 12 of the 12 calibration data  
 87 sets and the **FX-PDI** retention model combined with the 4 capillary bundle models. Parameter  $\tau_s$  and  
 88 the retention parameters were allowed to vary. Numbers in the subplots indicate RMSE<sub>θ</sub> and  
 89 RMSE<sub>logK</sub> values for the various model combinations.

90

91

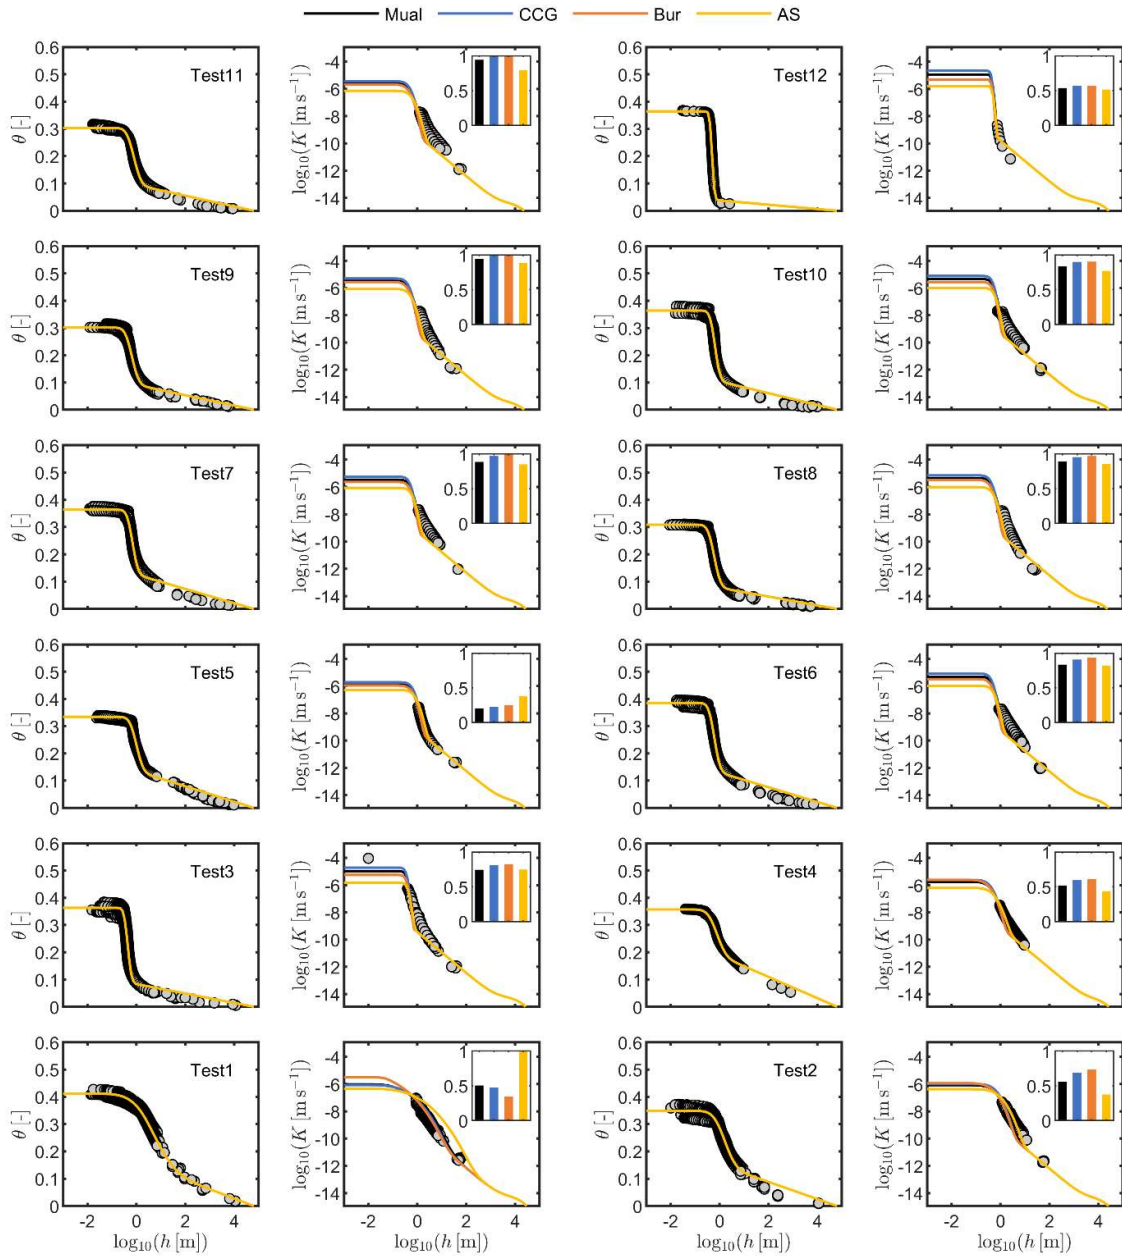

93

94 Fig. S13: Measured data (dots), fitted retention functions (left) and fully predicted conductivity  
 95 functions (right). Shown are the first 12 out of the 23 test data sets and the **Kos-PDI** retention model  
 96 combined with the 4 capillary bundle models. Bars show the RMSE<sub>logK</sub> values for the different used  
 97 capillary bundle models. Note that the conductivity curves are not fits to the data but pure  
 98 predictions.

99

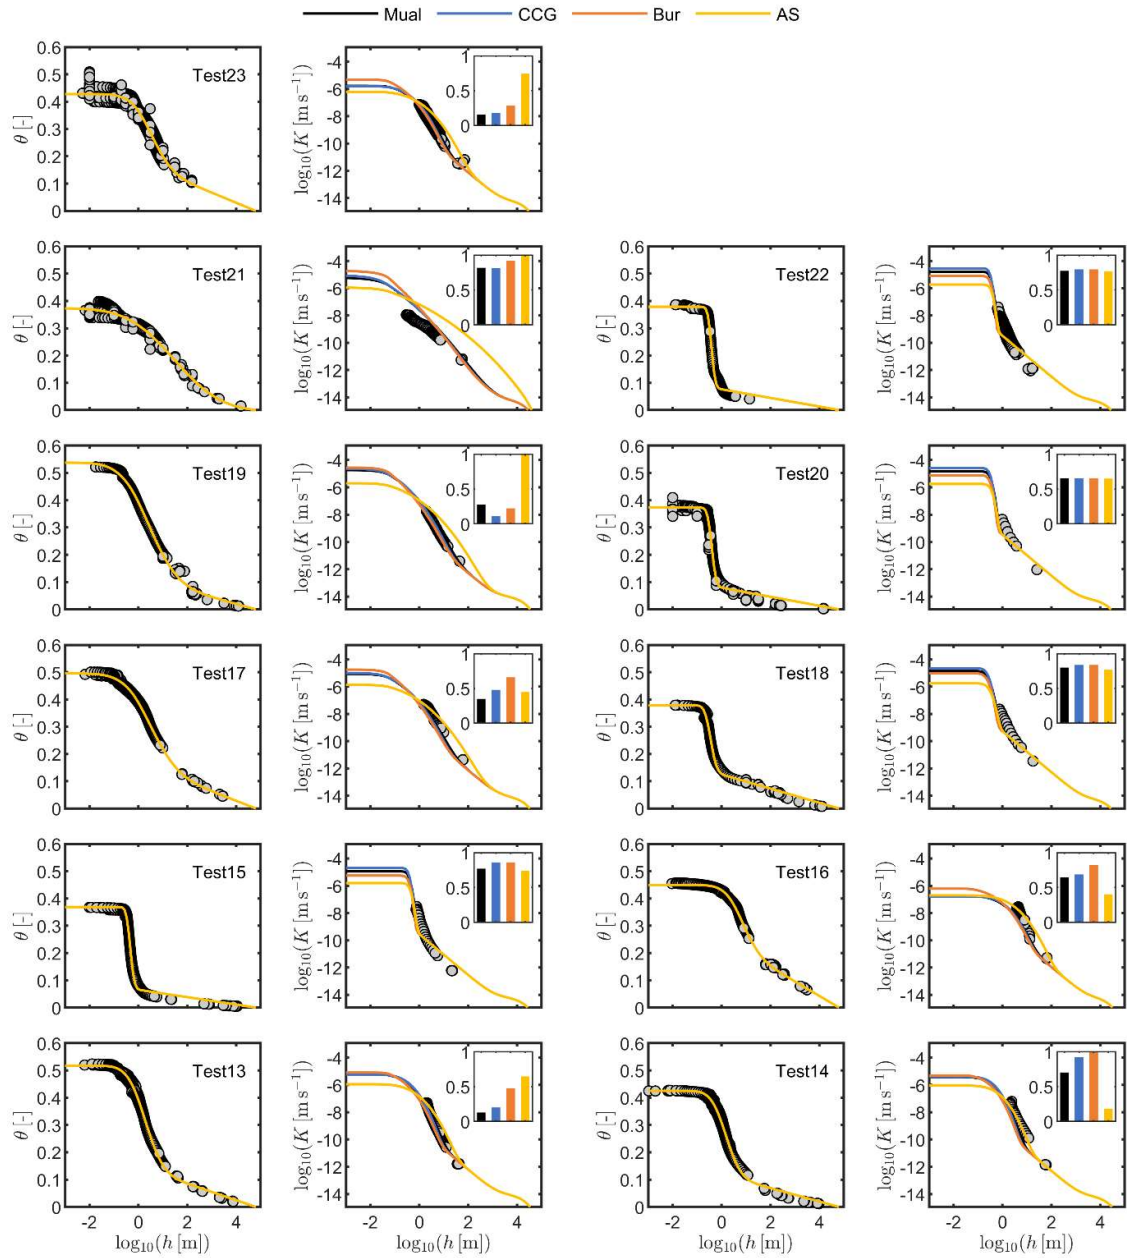

100

101 Fig. S14: Measured data (dots), fitted retention functions (left) and fully predicted conductivity  
 102 functions (right). Shown are data set 13 to 23 of the test data sets and the **Kos-PDI** retention model  
 103 combined with the 4 capillary bundle models. Bars show the RMSE<sub>logK</sub> values for the different used  
 104 capillary bundle models. Note that the conductivity curves are not fits to the data but pure  
 105 predictions.

106

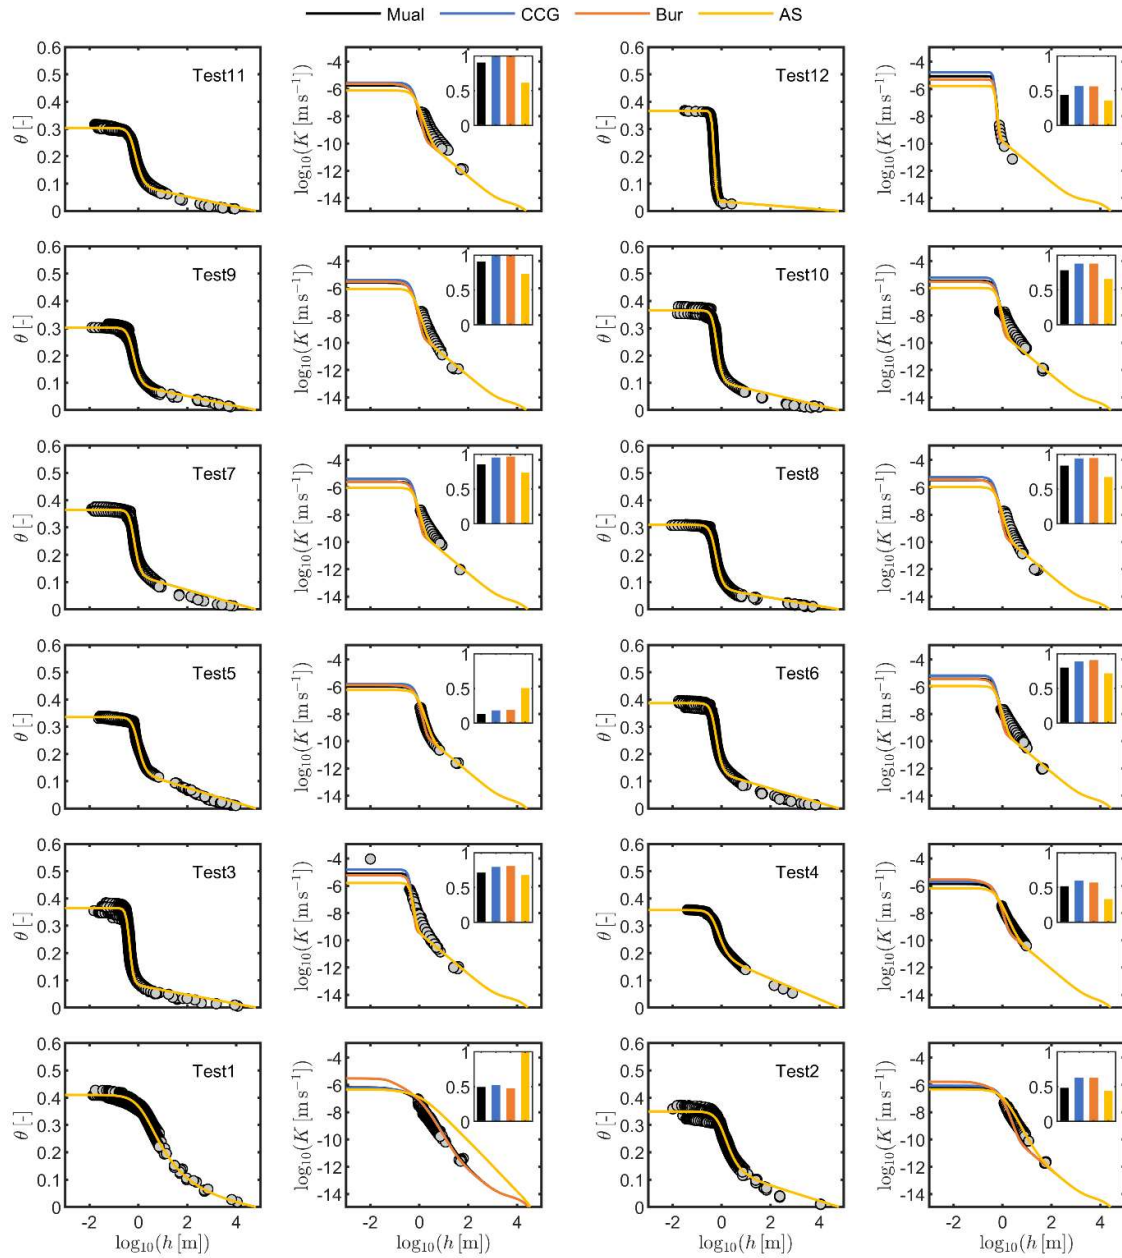

107

108 Fig. S15: Measured data (dots), fitted retention functions (left) and fully predicted conductivity  
 109 functions (right). Shown are the first 12 out of the 23 test data sets and the **vGc-PDI** retention model  
 110 combined with the 4 capillary bundle models. Bars show the RMSE<sub>logK</sub> values for the different used  
 111 capillary bundle models. Note that the conductivity curves are not fits to the data but pure  
 112 predictions.

113



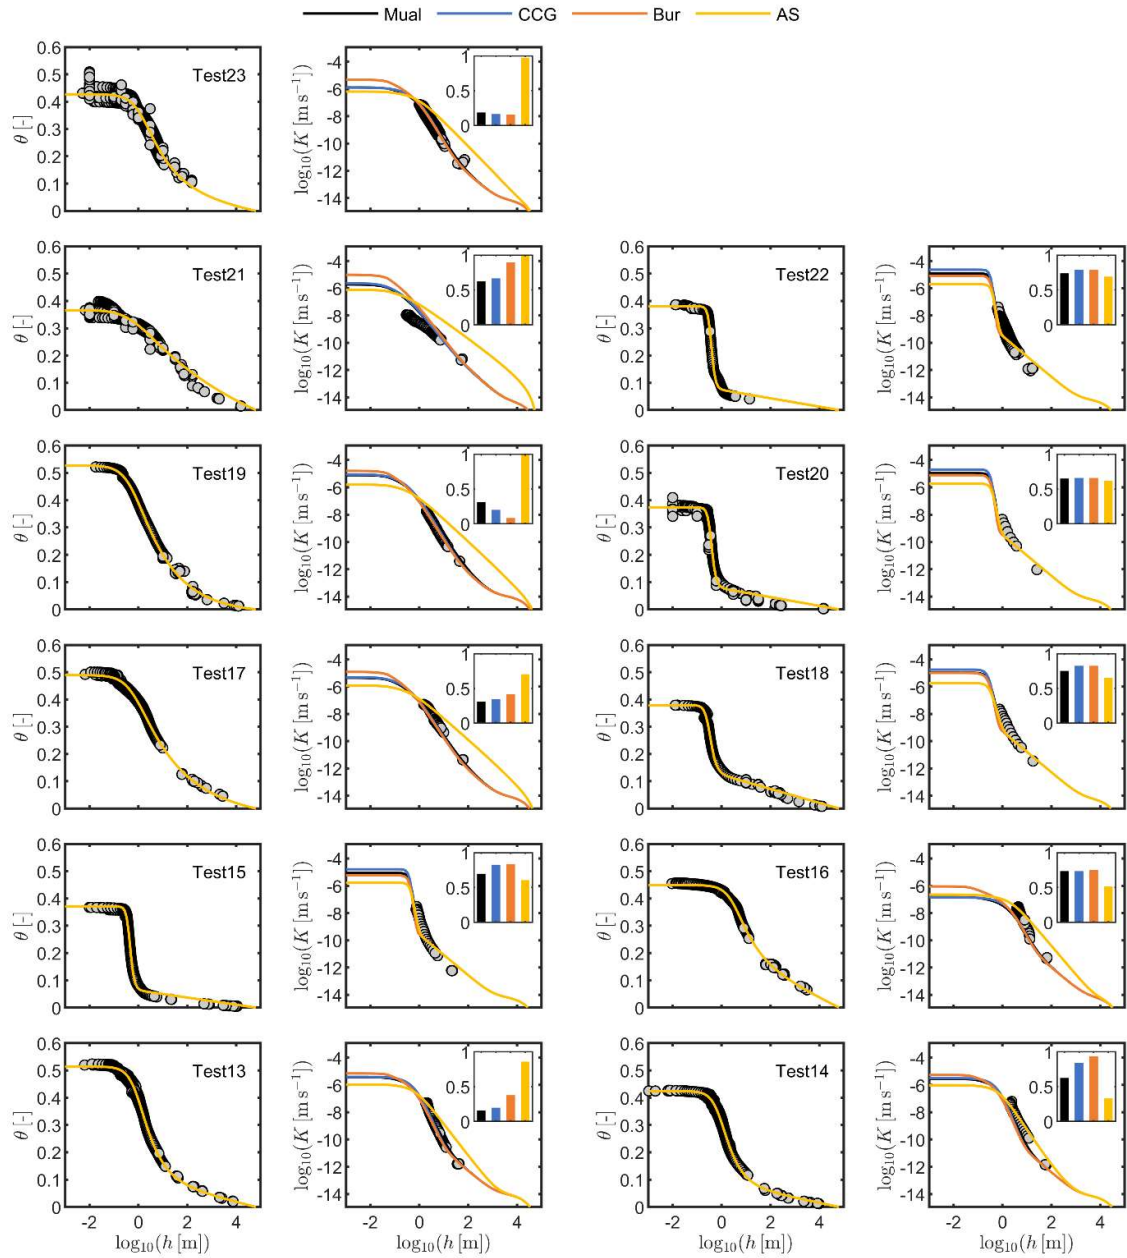

114

115 Fig. S16: Measured data (dots), fitted retention functions (left) and fully predicted conductivity  
 116 functions (right). Shown are data set 13 to 23 of the test data sets and the **vGc-PDI** retention model  
 117 combined with the 4 capillary bundle models. Bars show the  $RMSE_{\log K}$  values for the different used  
 118 capillary bundle models. Note that the conductivity curves are not fits to the data but pure  
 119 predictions.

120

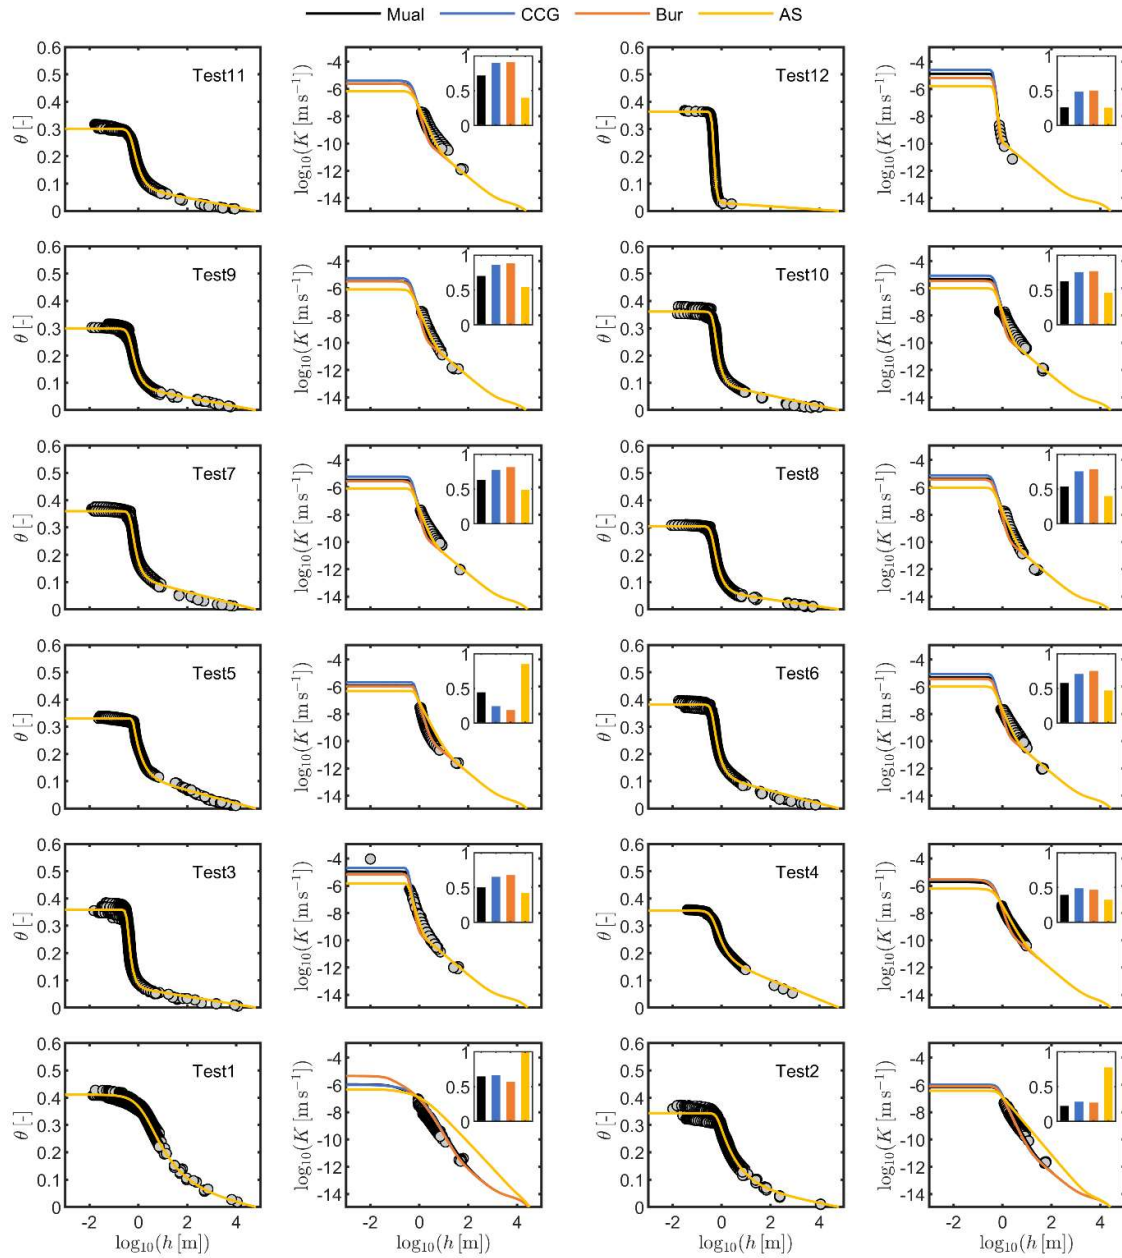

121

122 Fig. S17: Measured data (dots), fitted retention functions (left) and fully predicted conductivity  
 123 functions (right). Shown are the first 12 out of the 23 test data sets and the **vGmn-PDI** retention  
 124 model combined with the 4 capillary bundle models. Bars show the  $RMSE_{\log K}$  values for the different  
 125 used capillary bundle models. Note that the conductivity curves are not fits to the data but pure  
 126 predictions.

127

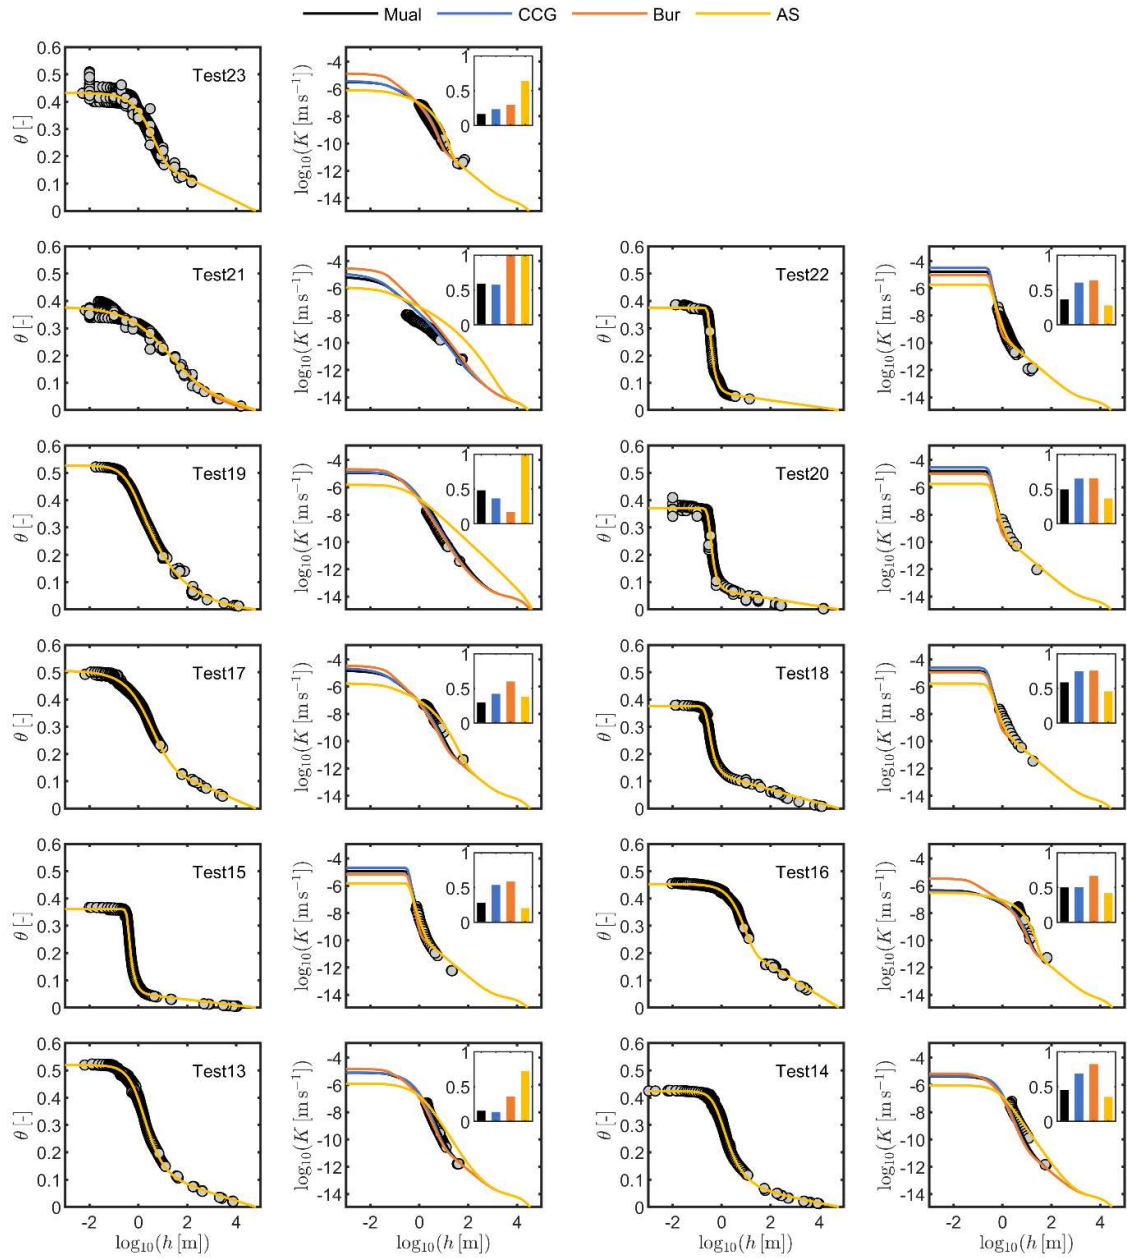

128

129 Fig. S18: Measured data (dots), fitted retention functions (left) and fully predicted conductivity  
 130 functions (right). Shown are data set 13 to 23 of the test data sets and the **vGmn-PDI** retention  
 131 model combined with the 4 capillary bundle models. Bars show the  $RMSE_{\log K}$  values for the different  
 132 used capillary bundle models. Note that the conductivity curves are not fits to the data but pure  
 133 predictions.

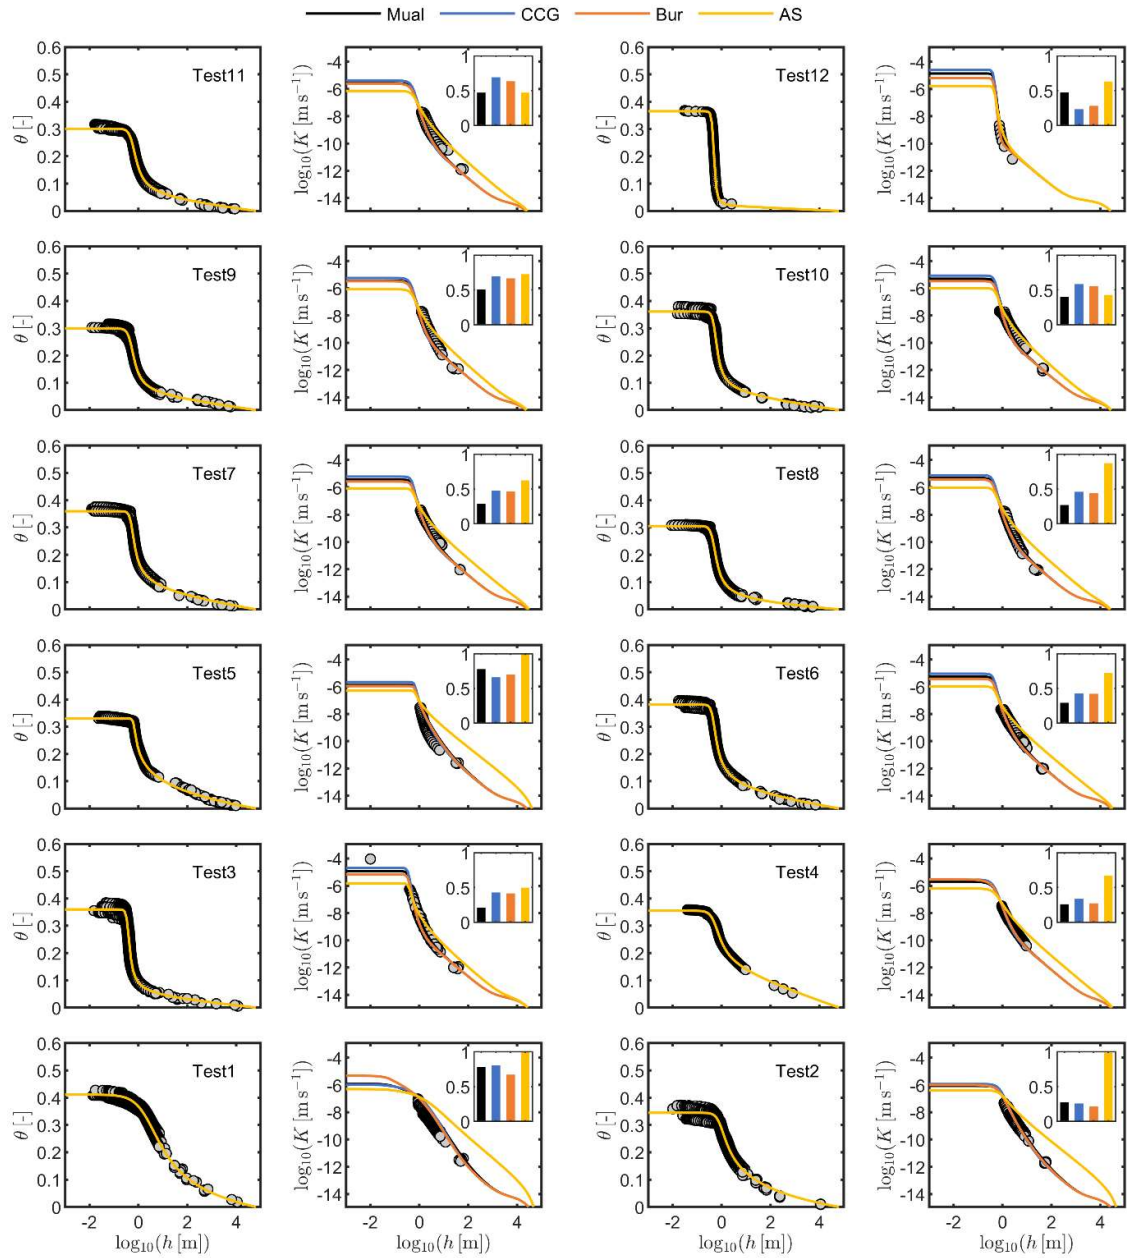

134

135 Fig. S19: Measured data (dots), fitted retention functions (left) and fully predicted conductivity  
 136 functions (right). Shown are the first 12 out of the 23 test data sets and the **FX-PDI** retention model  
 137 combined with the 4 capillary bundle models. Bars show the  $RMSE_{\log K}$  values for the different used  
 138 capillary bundle models. Note that the conductivity curves are not fits to the data but pure  
 139 predictions.

140

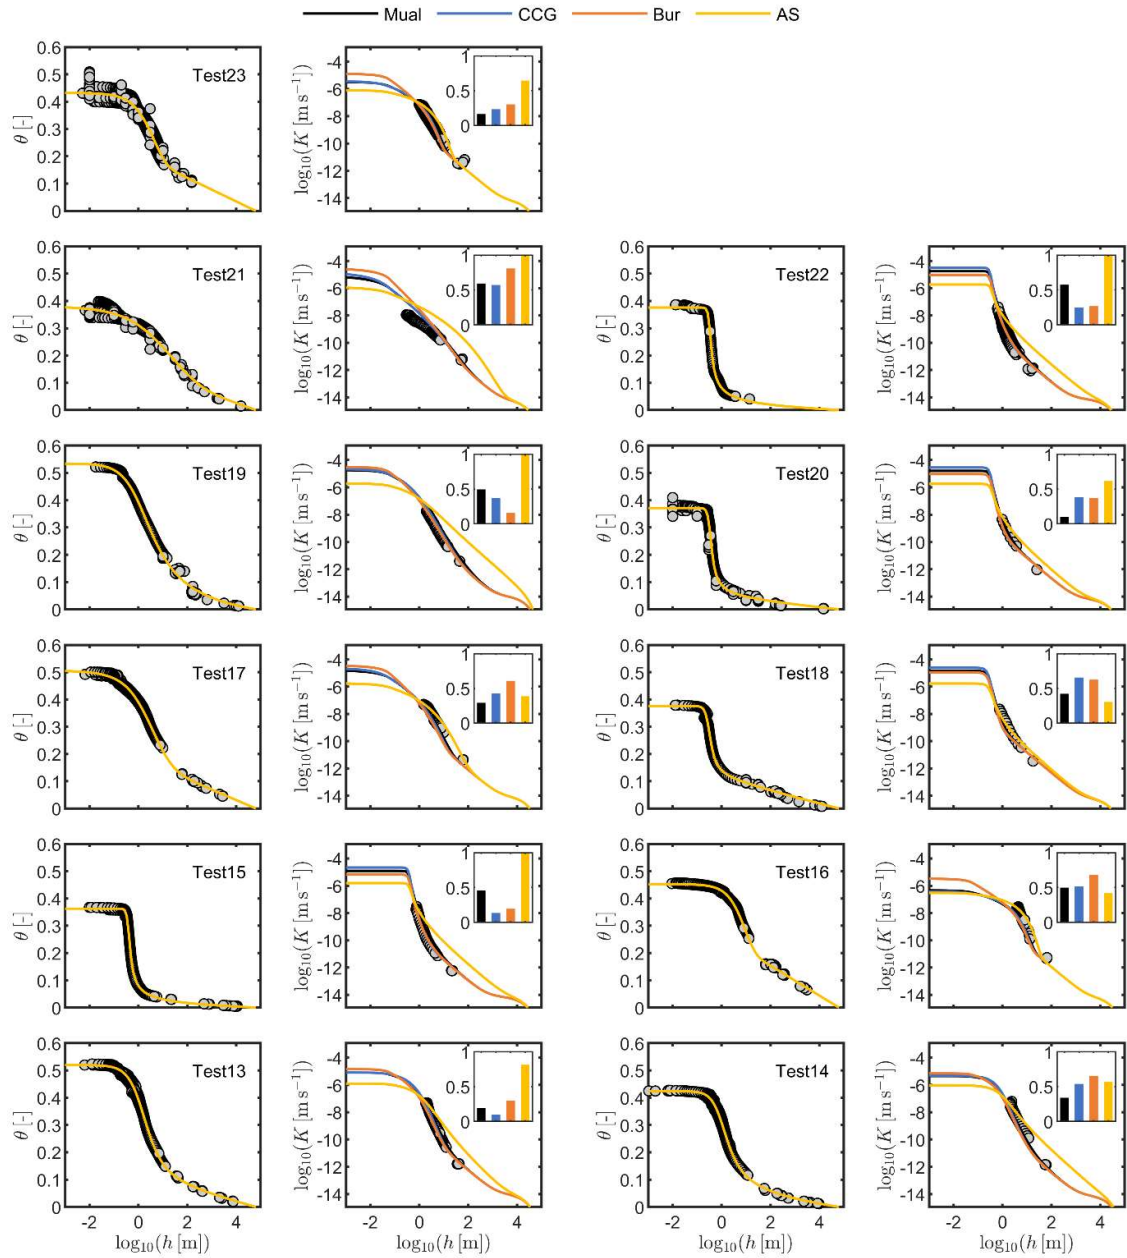

141

142 Fig. S20: Measured data (dots), fitted retention functions (left) and fully predicted conductivity  
 143 functions (right). Shown are data set 13 to 23 of the test data sets and the **FX-PDI** retention model  
 144 combined with the 4 capillary bundle models. Bars show the RMSE<sub>logK</sub> values for the different used  
 145 capillary bundle models. Note that the conductivity curves are not fits to the data but pure  
 146 predictions.

147
